# Supplementary material
Source: Springer Nature journal article supplement (https://www.springermedizin.de/resource/supplementary/13018_2007_46_MOESM1_ESM.pdf/9636222)

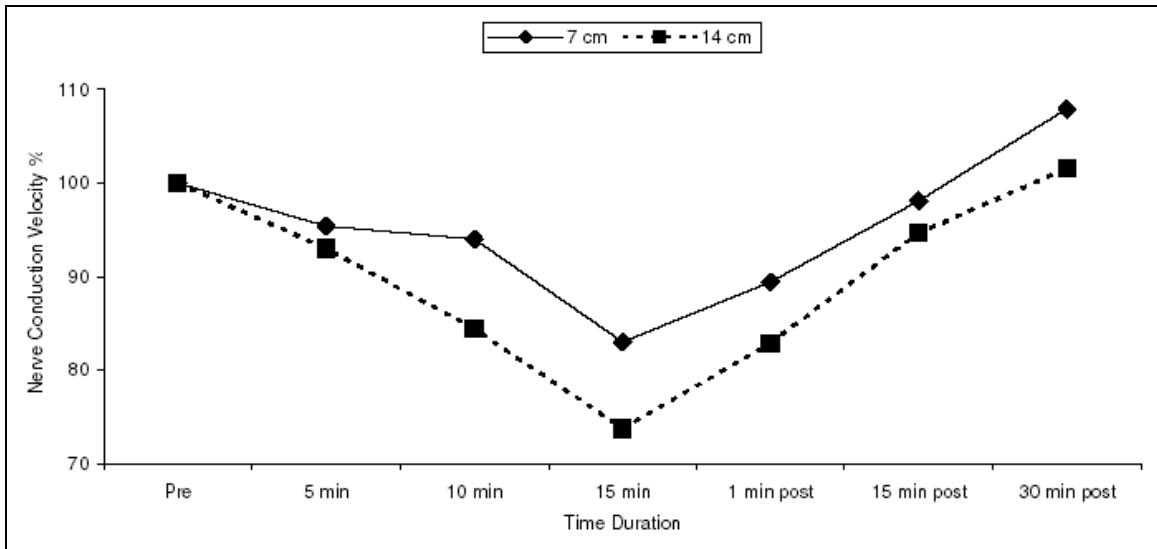

Supplement: MOESM1 [file 9636222]
